# Supplementary material for: Loss of Barx1 promotes hepatocellular carcinoma metastasis through up-regulating MGAT5 and MMP9 expression and indicates poor prognosis
Source: PubMed Central journal article supplement (PMC5641096; doi:10.18632/oncotarget.18288), 2017-05-30
Supplement: oncotarget-08-71867-s001.pdf [file oncotarget-08-71867-s001.pdf]

## Loss of Barx1 promotes hepatocellular carcinoma metastasis through up-regulating MGAT5 and MMP9 expression and indicates poor prognosis

### SUPPLEMENTARY MATERIALS

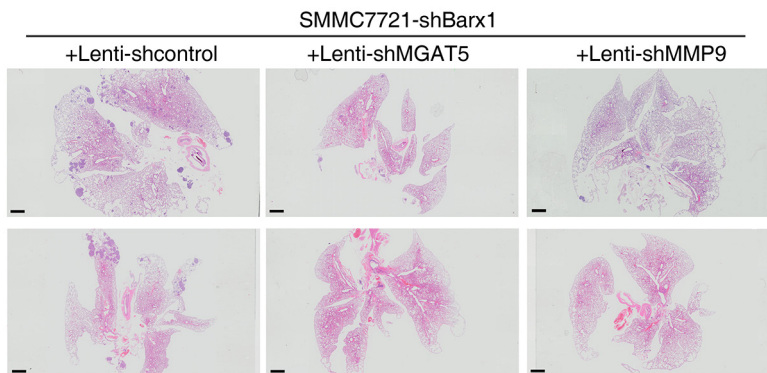

**Supplementary Figure 1: Representative HE staining images of the gross observation of lung metastasis from the indicated groups.** Scale bars represent 1 mm.

**Supplementary Table 1: List of genes differentially expressed in SMMC7721-shBarx1 versus SMMC7721-shcontrol cells using a human metastasis PCR array.**

See Supplementary File 1

Supplementary Table 2: Primer sequences used in the study

| Primer name                                           | Primer sequences                   | Enzyme |
|-------------------------------------------------------|------------------------------------|--------|
| Primers for MGAT5 promoter construct:                 |                                    |        |
| (-1530/+58)MGAT5 sense:                               | 5'-TATAGGTACCAGAGTATCTGTTACATAT-3' | KpnI   |
| (-871/+58)MGAT5 sense:                                | 5'-TATAGGTACCTATGCTCAGGTCCTACTT-3' | KpnI   |
| (-351/+58)MGAT5 sense:                                | 5'-TATAGGTACCTGATGGTGATATGACTCC-3' | KpnI   |
| antisense:                                            | 5'-TATACTCGAGCTGGTCTCACTCTGGCTC-3' | XhoI   |
| Primers for MGAT5 promoter site-directed mutagenesis: |                                    |        |
| Barx1 binding site 1 mutation sense:                  | 5'-TTCATGACCCcgcgAGCATATATA-3'     |        |
| Barx1 binding site 1 mutation antisense:              | 5'-TATATATGCTcgcgGGGTCATGAA-3'     |        |
| Barx1 binding site 2 mutation sense:                  | 5'-ATCTGGCTGCcgcgATATTGAAAC-3'     |        |
| Barx1 binding site 2 mutation antisense:              | 5'-GTTTCAATATcgcgGCAGCCAGAT-3'     |        |
| Primers used for ChIP in the MGAT5 promoter:          |                                    |        |
| Distant region sense:                                 | 5'-TGTAGAGATGCATTCTGT-3'           |        |
| Distant region antisense:                             | 5'-CCAGTTCAGAGACATGCA-3'           |        |
| Barx1 binding site 1 sense:                           | 5'-TAAGAGGTAGATAGTAAA-3'           |        |
| Barx1 binding site 1 antisense:                       | 5'-ACTGATCATCTAGGCATG-3'           |        |
| Barx1 binding site 2 sense:                           | 5'-CTATGCTCAGGTCCTACT-3'           |        |
| Barx1 binding site 2 antisense:                       | 5'-GCATGCTGTAGCACAAGA-3'           |        |
| Primers for MMP9 promoter construct:                  |                                    |        |
| (-1280/+139)MMP9 sense:                               | 5'-TATAGGTACCTGGCATAAGTGTGATAAT-3' | KpnI   |
| (-1016/+139)MMP9 sense:                               | 5'-TATAGGTACCCATGGCTCACTGTATCT-3'  | KpnI   |
| (-468/+139)MMP9 sense:                                | 5'-TATAGGTACCGGATATCTGACCTGGAG-3'  | KpnI   |
| (-152/+139)MMP9 sense:                                | 5'-TATAGGTACCTCTCATGCTGGTGCTGCC-3' | KpnI   |
| antisense:                                            | 5'-TATACTCGAGGGTGAGATTGGTTCTCAG-3' | XhoI   |
| Primers for MMP9 promoter site-directed mutagenesis:  |                                    |        |
| Barx1 binding site 1 mutation sense:                  | 5'-GCTCCTATAGcgcgTTTTCCCCCA-3'     |        |
| Barx1 binding site 1 mutation antisense:              | 5'-TGGGGGAAAACcgcgCTATAGGAGC-3'    |        |
| Barx1 binding site 2 mutation sense:                  | 5'-GGCCTTAGTAcgcgAAACCAATCA-3'     |        |
| Barx1 binding site 2 mutation antisense:              | 5'-TGATTGGTTTcgcgTACTAAGGCC-3'     |        |

(Continued)

| Primer name                                 | Primer sequences                            | Enzyme |
|---------------------------------------------|---------------------------------------------|--------|
| Barx1 binding site 3 mutation sense:        | 5'-CAGGGGGATC <del>cgcg</del> GTTTCAGAAA-3' |        |
| Barx1 binding site 3 mutation antisense:    | 5'-TTTCTGAAAC <del>cgcg</del> GATCCCCCTG-3' |        |
| Primers used for ChIP in the MMP9 promoter: |                                             |        |
| Distant region sense:                       | 5'-TAGCATAGCAGTGAACAC-3'                    |        |
| Distant region antisense:                   | 5'-ATCTCAGCTCTGCCACTG-3'                    |        |
| Barx1 binding site 1 sense:                 | 5'-TTGGCATAAGTGTGATAA-3'                    |        |
| Barx1 binding site 1 antisense:             | 5'-TCTAAGCTGCAGTGTAAC-3'                    |        |
| Barx1 binding site 2 sense:                 | 5'-GCAGTGACATAATCATGG-3'                    |        |
| Barx1 binding site 2 antisense:             | 5'-CACTGTAGGTTGTAAGTC-3'                    |        |
| Barx1 binding site 3 sense:                 | 5'-AGGATATCTGACCTGGGA-3'                    |        |
| Barx1 binding site 3 antisense:             | 5'-CTTGTGGGAACTGTATGA-3'                    |        |
